# Supplementary material for: Compensation policies for hotel, food and beverage department`s employees / Foon Hoong Fatt.
Source: MDPI journal article supplement (doi:10.3390/pharmaceutics13060857), 2004-01-01
Supplement: s1 [file s1]

# Supplementary Materials: Effects of *p*-Cresol on Oxidative Stress, Glutathione Depletion, and Necrosis in HepaRG Cells: Comparisons to Other Uremic Toxins and the Role of *p*-Cresol Glucuronide Formation

Sang Zhu, Yan Rong and Tony K. L. Kiang

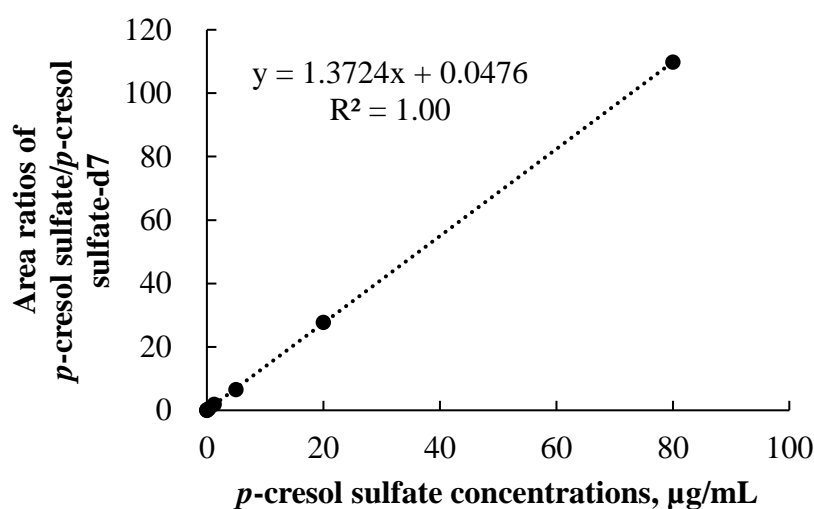

**Figure S1.** Calibration curve of *p*-cresol sulfate based on a weighted ( $1/x^2$ ) least-squares regression model.

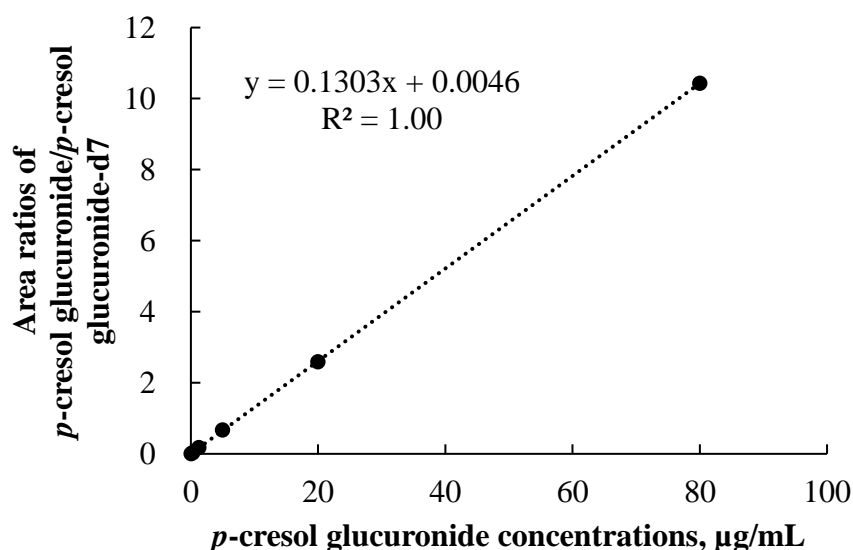

**Figure S2.** Calibration curve of *p*-cresol glucuronide based on a weighted ( $1/x^2$ ) least-squares regression model.

**Table S1.** Accuracy and precision data of the UPLC/MS/MS assay for the measurement of *p*-cresol sulfate and *p*-cresol glucuronide.

|                              | Nominal concentration | Intra-day 1, <i>n</i> = 5 |              | Intra-day 2, <i>n</i> = 5 |              | Intra-day 3, <i>n</i> = 5 |              | Inter-day, <i>n</i> = 15 |              |
|------------------------------|-----------------------|---------------------------|--------------|---------------------------|--------------|---------------------------|--------------|--------------------------|--------------|
|                              |                       | CV (%)                    | Accuracy (%) | CV (%)                    | Accuracy (%) | CV (%)                    | Accuracy (%) | CV (%)                   | Accuracy (%) |
| <i>p</i> -cresol sulfate     | 60 µg/mL (high QC)    | 4.31                      | 102.88       | 5.12                      | 95.39        | 7.78                      | 98.09        | 6.84                     | 106.07       |
|                              | 30 µg/mL (medium QC)  | 2.70                      | 98.25        | 0.17                      | 91.09        | 5.10                      | 93.67        | 3.53                     | 95.51        |
|                              | 0.004 ng/mL (low QC)  | 2.48                      | 90.75        | 10.23                     | 87.14        | 4.34                      | 86.52        | 8.22                     | 86.77        |
|                              | 0.001 ng/mL (LLOQ)    | 17.44                     | 104.98       | 15.01                     | 97.34        | 6.79                      | 100.09       | 12.83                    | 101.55       |
| <i>p</i> -cresol glucuronide | 60 µg/mL (high QC)    | 2.55                      | 89.20        | 2.76                      | 85.88        | 5.61                      | 85.44        | 3.73                     | 86.48        |
|                              | 30 µg/mL (medium QC)  | 3.30                      | 95.79        | 6.89                      | 92.69        | 5.12                      | 88.56        | 4.22                     | 92.27        |
|                              | 0.23 µg/mL (low QC)   | 7.61                      | 113.92       | 1.03                      | 111.47       | 0.09                      | 108.19       | 2.35                     | 111.69       |
|                              | 0.08 µg/mL (LLOQ)     | 3.47                      | 107.59       | 0.87                      | 105.21       | 1.41                      | 102.04       | 1.53                     | 103.94       |

CV, coefficient of variation; LLOQ, lower limit of quantification; QC, quality control; UPLC/MS/MS, ultra-high performance liquid chromatography-tandem mass spectrometry.

**Table S2.** Stability data of the UPLC/MS/MS assay for the measurement of *p*-cresol sulfate and *p*-cresol glucuronide.

| Nominal Concentration | <i>p</i> -Cresol Sulfate |                    | <i>p</i> -Cresol Glucuronide |                    |
|-----------------------|--------------------------|--------------------|------------------------------|--------------------|
|                       | 0.004 ng/mL (Low QC)     | 60 µg/mL (High QC) | 0.23 µg/mL (Low QC)          | 60 µg/mL (High QC) |
|                       | Accuracy (%)             | Accuracy (%)       | Accuracy (%)                 | Accuracy (%)       |
| Autosampler stability | 99.87                    | 94.23              | 94.79                        | 106.33             |
| Bench-top stability   | 96.18                    | 101.77             | 89.68                        | 97.31              |
| Freeze-thaw stability | 113.25                   | 91.01              | 92.79                        | 104.12             |
| Two-week stability    | 99.75                    | 99.64              | 99.31                        | 105.51             |

Various conditions were tested: 1) autosampler stability (i.e. 24 h at 4 °C), 2) bench-top stability (i.e. 6 h at “room temperature”, 23.5 °C), 3) freeze-thaw stability (i.e. 3 cycles of freezing/thawing, where samples were frozen at −80 °C for 23.5 h then thawed at room temperature for 0.5 h), and 4) two-week stability (i.e. 2 weeks at −80 °C). QC, quality control; UPLC/MS/MS, ultra-high performance liquid chromatography-tandem mass spectrometry.

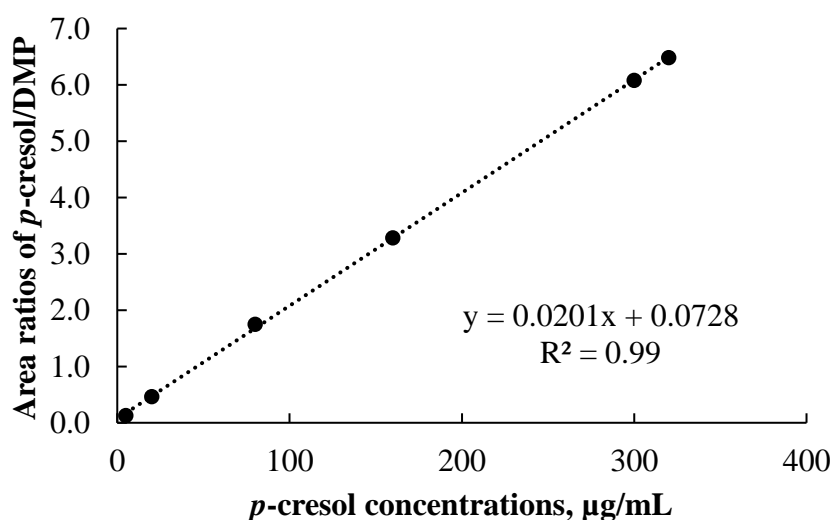

**Figure S3.** Calibration curve of *p*-cresol based on a weighted ( $1/x^2$ ) least-squares regression model.**Table S3.** Accuracy and precision data of the UPLC assay for the measurement of *p*-cresol.

| Concentration         | Intra-Day 1 ( <i>n</i> = 5) |             | Intra-Day 2 ( <i>n</i> = 5) |             | Intra-Day 3 ( <i>n</i> = 5) |             | Intra-Day ( <i>n</i> = 15) |             |
|-----------------------|-----------------------------|-------------|-----------------------------|-------------|-----------------------------|-------------|----------------------------|-------------|
|                       | CV (%)                      | Accuracy, % | CV (%)                      | Accuracy, % | CV (%)                      | Accuracy, % | CV (%)                     | Accuracy, % |
| 300 µg/mL (high QC)   | 5.14                        | 89.54       | 3.01                        | 89.84       | 1.87                        | 96.78       | 3.34                       | 92.05       |
| 160 µg/mL (medium QC) | 2.33                        | 91.44       | 2.08                        | 94.31       | 6.42                        | 104.37      | 3.61                       | 96.71       |
| 20 µg/mL (Low QC)     | 3.22                        | 97.32       | 4.00                        | 101.15      | 8.75                        | 110.90      | 5.32                       | 103.12      |
| 5 µg/mL (medium LLOQ) | 6.03                        | 102.11      | 5.07                        | 102.46      | 8.01                        | 98.77       | 6.37                       | 101.11      |

CV, coefficient of variation; LLOQ, lower limit of quantification; QC, quality control; UPLC, ultra-high performance liquid chromatography.

**Table S4.** Stability data of the UPLC assay for the measurement of *p*-cresol.

| Nominal Concentration (µg/mL) | 20 µg/mL (Low QC) | 300 µg/mL (High QC) |
|-------------------------------|-------------------|---------------------|
|                               | Accuracy (%)      | Accuracy (%)        |
| Autosampler stability (%)     | 85.32             | 93.80               |
| Bench-top stability (%)       | 104.93            | 113.01              |
| Freeze-thaw stability (%)     | 105.60            | 113.79              |
| Long-term stability (%)       | 101.32            | 99.66               |

Various conditions were tested: 1) autosampler stability (i.e. 24 h at 4 °C), 2) bench-top stability (i.e. 6 h at “room temperature”, 23.5 °C), 3) freeze-thaw stability (i.e. 3 cycles of freezing/thawing, where samples were frozen at −80 °C for 23.5 h then thawed at room temperature for 0.5 h), and 4) long-term stability (i.e. 3 days at −80 °C). QC, quality control; UPLC, ultra-high performance liquid chromatography.
